# Supplementary material for: Adiposity-Mortality Relationships in Type 2 Diabetes, Coronary Heart Disease, and Cancer Subgroups in the UK Biobank, and Their Modification by Smoking
Source: Oxford University Press journal article supplement (doi:10.2337/dc17-2508), 2018-07-03
Supplement: dc172508supplementarydata.pdf [file dc172508supplementarydata.pdf]

## SUPPLEMENTARY DATA

**Supplementary Figure S1.** – Adjusted hazard ratios (95% CI) for all-cause mortality associated with BMI by sex for the whole cohort and each subgroup separately

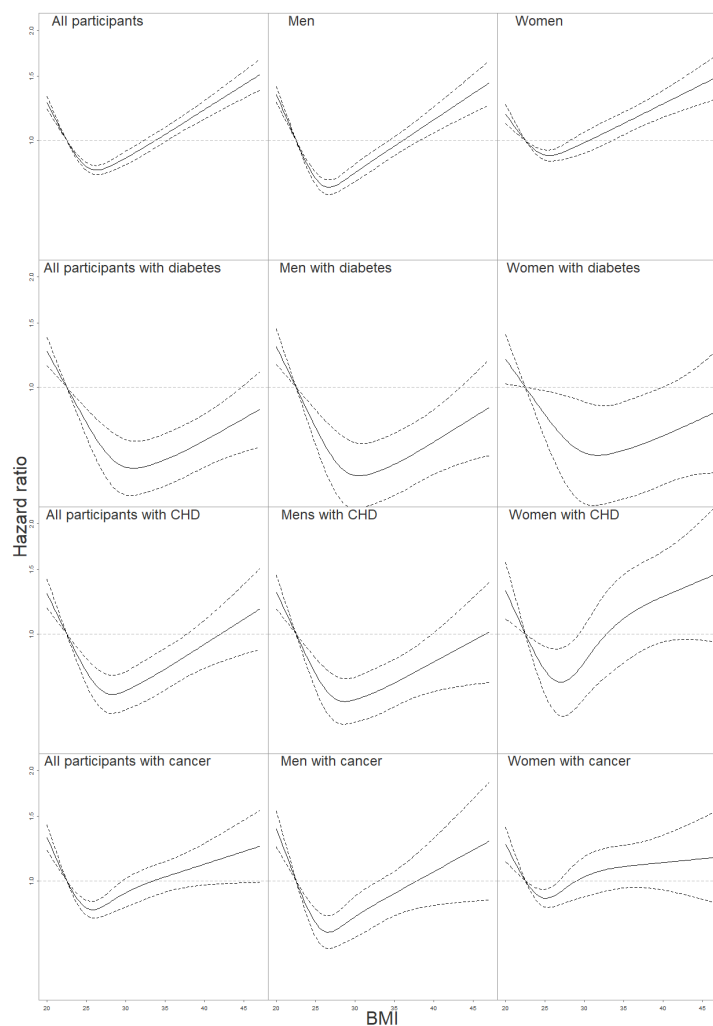

\* Models are adjusted for, age, smoking status (current, past and never), ethnicity, education, deprivation index and chronic diseases diagnosed before study entry

## SUPPLEMENTARY DATA

**Supplementary Table S1.** – BMI, body fat and waist circumference values (95% CI) associated with the minimum all-cause mortality risk by gender and the presence of type 2 diabetes and CHD

| Population                           | BMI                | % Body fat         | Waist circumference  |
|--------------------------------------|--------------------|--------------------|----------------------|
| All participants                     | 27.2 (26.6 - 27.7) | 26.8 (20.7 – 29.4) | 86.9 (83.8 – 88.8)   |
| Participants with type 2 diabetes    | 33.4 (31.5 - 35.4) | 35.6 (25.3 – 67.2) | 102.9 (97.5 – 105.5) |
| Participants with CHD                | 30.1 (29.3 - 30.9) | 30.3 (27.4 – 32.6) | 96.0 (83.0 – 99.0)   |
| Participants without type 2 diabetes | 27.3 (26.9 - 27.7) | 28.2 (20.9 – 30.2) | 87.0 (84.1 – 88.7)   |
| Participants with cancer             | 27.4 (25.8 - 30.3) | 30.9 (22.7 – 36.8) | 87.3 (81.0 – 90.6)   |
| Women                                | 27.3 (26.6 - 28.0) | 36.0 (35.2 - 37.0) | 81.1 (58.8 - 103.4)  |
| Women with type 2 diabetes           | 34.1 (32.4 - 39.6) | 44.3 (21.9 - 66.8) | 99.1 (41.7 - 156.5)  |
| Women with CHD                       | 29.4 (19.0 - 39.8) | 39.5 (33.9 - 45.3) | 86.0 (55.1 - 117.0)  |
| Women with cancer                    | 26.3 (23.6 – 32.0) | 37.0 (35.6 - 38.7) | 80.9 (45.0 – 86.0)   |
| Women without type 2 diabetes        | 27.2 (26.5 - 27.9) | 36.0 (35.1 - 36.9) | 81.6 (71.8 - 91.4)   |
| Men                                  | 28.2 (27.8 - 28.5) | 24.5 (23.9 - 25.1) | 95.1 (93.7 - 96.5)   |
| Men with type 2 diabetes             | 31.7 (30.8 - 32.6) | 29.2 (25.5 - 32.9) | 104.6 (91.3 - 118.0) |
| Men with CHD                         | 29.9 (29.3 - 30.5) | 27.7 (26.6 - 28.8) | 101 (98.6 - 103.4)   |
| Men without type 2 diabetes          | 28.1 (27.8 - 28.4) | 24.5 (23.9 - 25.1) | 95.0 (93.7 - 96.3)   |
| Men with cancer                      | 28.2 (25.6 - 31.9) | 25.2 (23.6 - 26.1) | 97.6 (95.5 - 99.2)   |

## SUPPLEMENTARY DATA

**Supplementary Figure S2.** - Adjusted hazard ratios (95% CI) for all-cause mortality associated with waist circumference by smoking status (never smokers = NS, previous smoker = PS and current smokers = CS) in men and women and by CHD, type 2 diabetes and cancer status at baseline with BMI 22.5 as referent

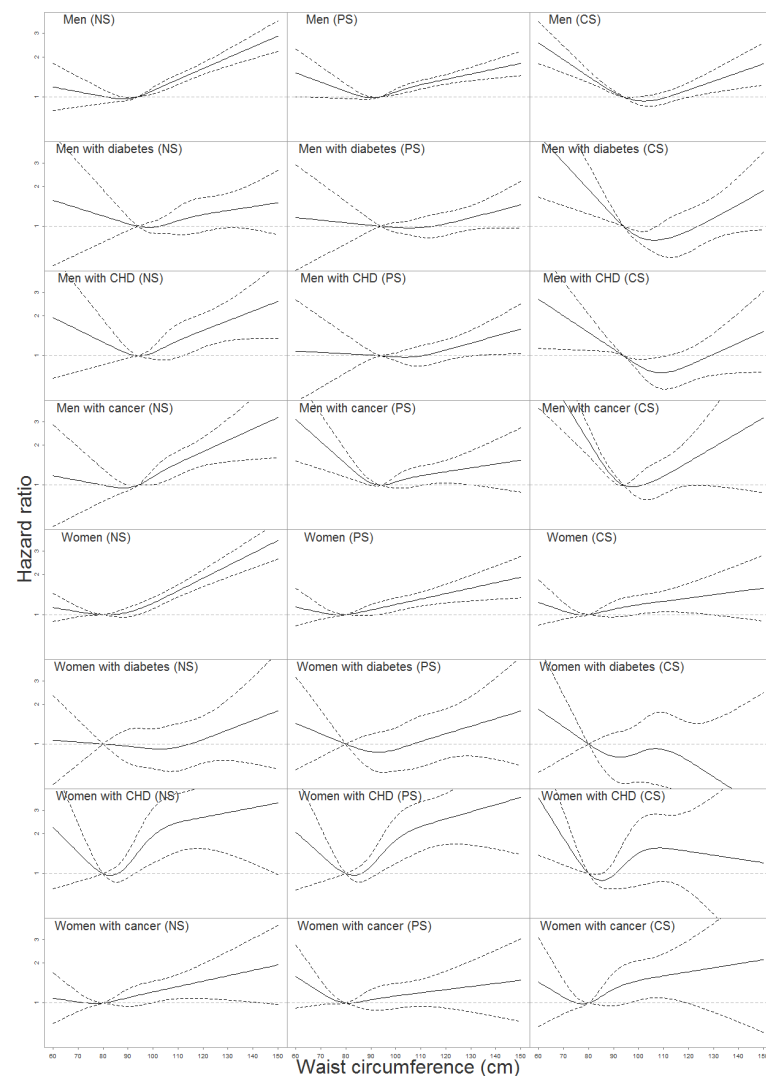

\* Models are adjusted for, age, smoking status (current, past and never), ethnicity, education, deprivation index and chronic diseases diagnosed before study entry

## SUPPLEMENTARY DATA

**Supplementary Figure S3.** - Adjusted hazard ratios (95% CI) for all-cause mortality associated with waist to hip ratio by smoking status (never smokers = NS, previous smoker = PS and current smokers = CS) in men and women and by CHD, type 2 diabetes and cancer status at baseline with BMI 22.5 as referent

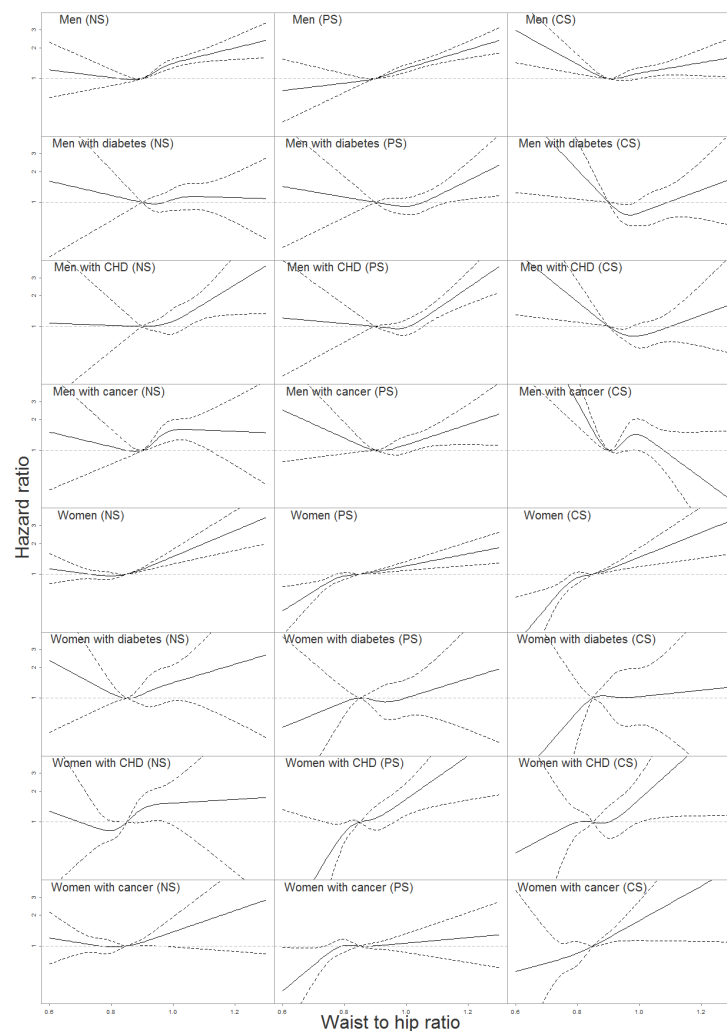

\* Models are adjusted for, age, smoking status (current, past and never), ethnicity, education, deprivation index and chronic diseases diagnosed before study entry

## SUPPLEMENTARY DATA

**Supplementary Figure S4.** - Adjusted hazard ratios (95% CI) for cancer mortality associated with BMI by smoking status (never smokers = NS, previous smoker = PS and current smokers = CS) in men and women and by CHD, type 2 diabetes and cancer status at baseline with BMI 22.5 as referent

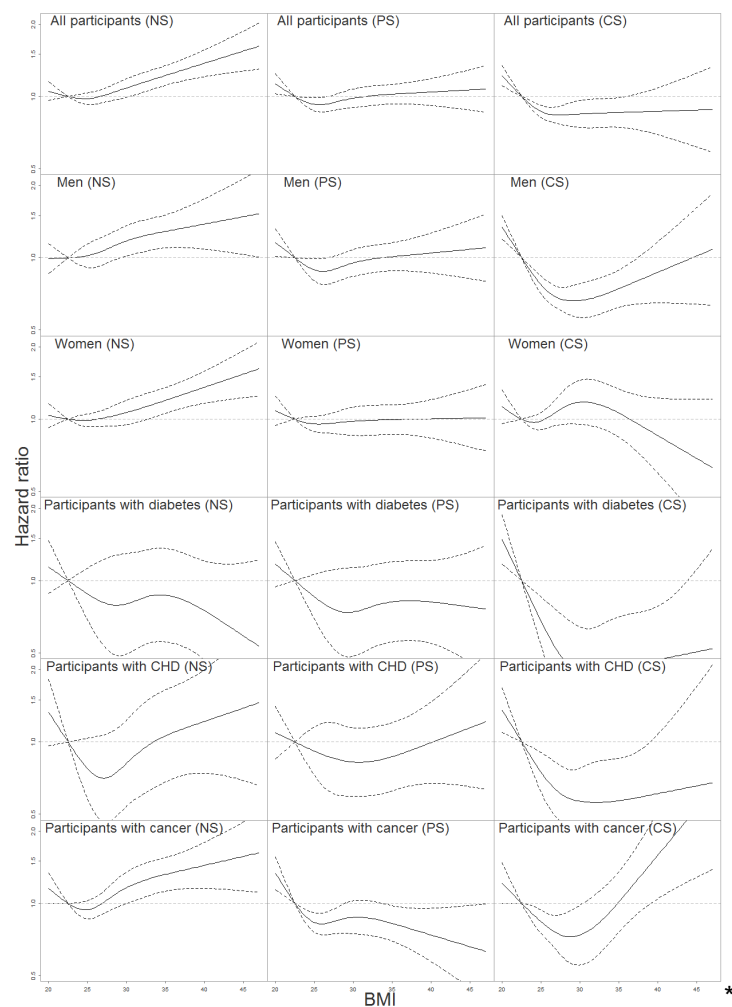

Models are adjusted for, age, smoking status (current, past and never), ethnicity, education, deprivation index and chronic diseases diagnosed before study entry

## SUPPLEMENTARY DATA

**Supplementary Figure S5.** - Adjusted hazard ratios (95% CI) for cardiovascular mortality associated with BMI by smoking status (never smokers = NS, previous smoker = PS and current smokers = CS) in men and women and by CHD, type 2 diabetes and cancer status at baseline with BMI 22.5 as referent

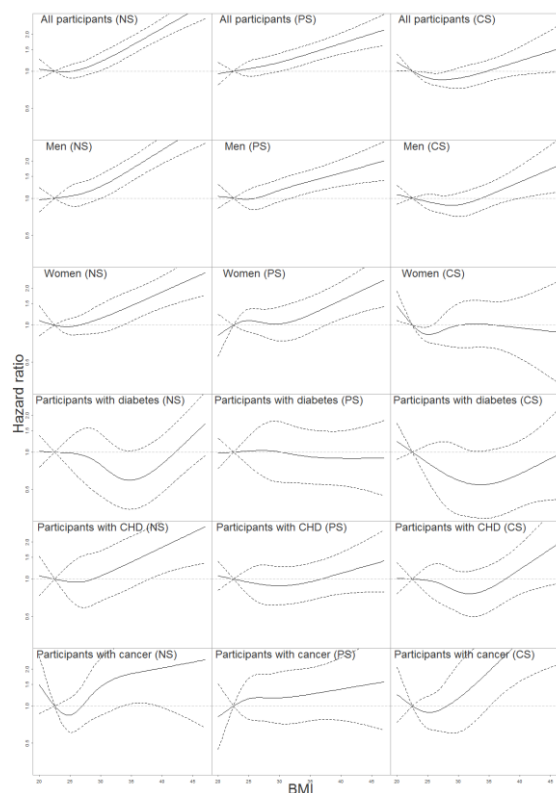

\* Models are adjusted for, age, smoking status (current, past and never), ethnicity, education, deprivation index and chronic diseases diagnosed before study entry

## SUPPLEMENTARY DATA

**Supplementary Figure S6.** - Adjusted hazard ratios (95% CI) for “other” mortality associated with BMI by smoking status (never smokers = NS, previous smoker = PS and current smokers = CS) in men and women and by CHD, type 2 diabetes and cancer status at baseline with BMI 22.5 as referent

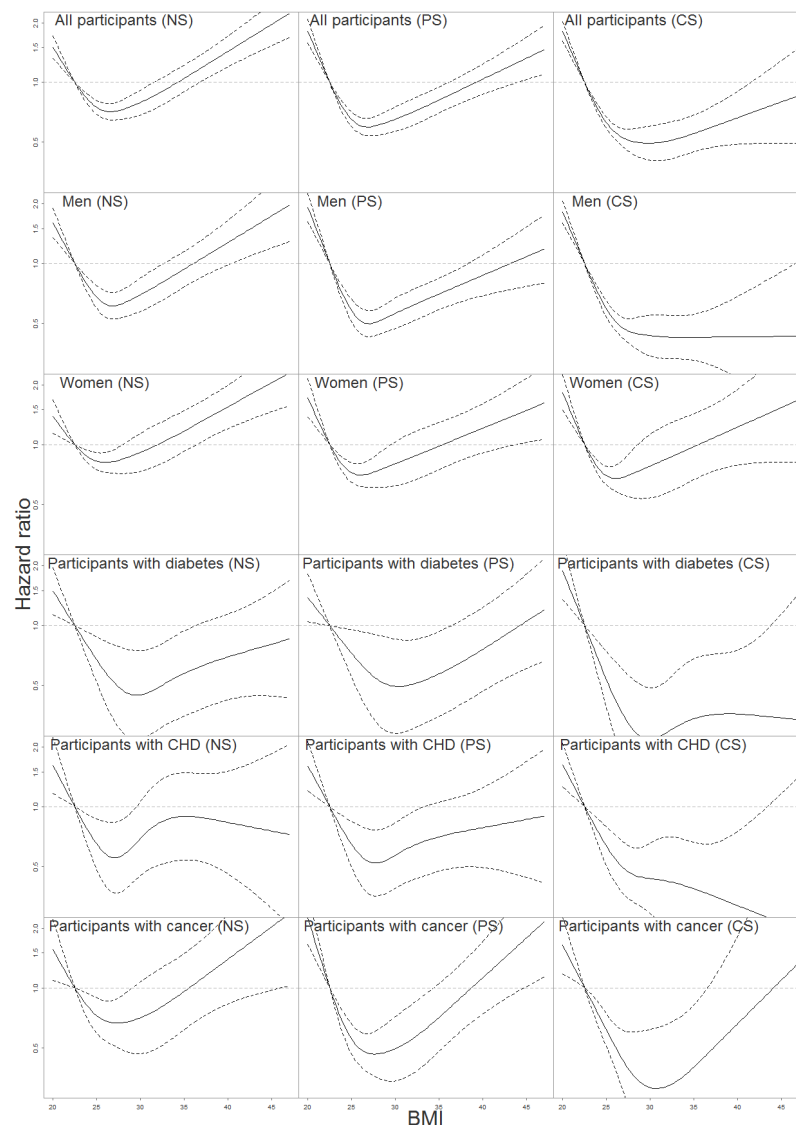

\* Models are adjusted for, age, smoking status (current, past and never), ethnicity, education, deprivation index and chronic diseases diagnosed before study entry

# SUPPLEMENTARY DATA

**Supplementary Table S2.** - Adjusted hazard ratios (95% CI) for all covariates adjusted for in the BMI and all-cause mortality models

| Covariate            | All participants      | Women only            | Men only              | Participants with CHD | Participants with diabetes | Participants with cancer |
|----------------------|-----------------------|-----------------------|-----------------------|-----------------------|----------------------------|--------------------------|
| Age at baseline      | -0.07 (-0.08 , -0.06) | -0.08 (-0.09 , -0.07) | -0.06 (-0.07 , -0.05) | -0.07 (-0.09 , -0.04) | -0.11 (-0.13 , -0.08)      | -0.02 (-0.03 , 0)        |
| Deprivation score    | 0.04 (0.04 , 0.05)    | 0.03 (0.02 , 0.03)    | 0.05 (0.04 , 0.06)    | 0.05 (0.04 , 0.06)    | 0.04 (0.02 , 0.05)         | 0.03 (0.02 , 0.04)       |
| Ethnicity            |                       |                       |                       |                       |                            |                          |
| White                | -                     | -                     | -                     | -                     | -                          | -                        |
| South Asian          | -0.26 (-0.43 , -0.09) | -0.56 (-0.93 , -0.2)  | -0.16 (-0.35 , 0.03)  | -0.15 (-0.48 , 0.17)  | -0.33 (-0.59 , -0.06)      | -0.16 (-0.64 , 0.32)     |
| African Caribbean    | -0.49 (-0.67 , -0.3)  | -0.4 (-0.69 , -0.12)  | -0.55 (-0.8 , -0.3)   | -0.42 (-1.04 , 0.19)  | -0.43 (-0.79 , -0.06)      | 0.21 (-0.13 , 0.56)      |
| Mixed or other       | -0.22 (-0.37 , -0.07) | 0.05 (-0.15 , 0.26)   | -0.46 (-0.67 , -0.24) | -0.84 (-1.35 , -0.32) | -0.41 (-0.75 , -0.06)      | 0.14 (-0.19 , 0.48)      |
| Qualifications       |                       |                       |                       |                       |                            |                          |
| Degree or higher     | -                     | -                     | -                     | -                     | -                          | -                        |
| A level              | 0.07 (0.01 , 0.14)    | 0.03 (-0.07 , 0.13)   | 0.1 (0.01 , 0.18)     | 0.02 (-0.2 , 0.23)    | 0.01 (-0.21 , 0.22)        | 0.12 (-0.02 , 0.25)      |
| GCSE                 | 0.1 (0.04 , 0.15)     | 0.01 (-0.07 , 0.09)   | 0.14 (0.07 , 0.21)    | 0.14 (-0.03 , 0.3)    | 0.05 (-0.11 , 0.22)        | 0.09 (-0.02 , 0.19)      |
| CSE                  | 0.13 (0.04 , 0.23)    | 0.05 (-0.1 , 0.19)    | 0.18 (0.06 , 0.31)    | 0.14 (-0.16 , 0.43)   | -0.09 (-0.4 , 0.21)        | -0.08 (-0.3 , 0.14)      |
| NVQ                  | 0.07 (0 , 0.14)       | -0.02 (-0.16 , 0.12)  | 0.12 (0.04 , 0.21)    | 0.02 (-0.17 , 0.22)   | -0.11 (-0.32 , 0.1)        | 0.04 (-0.11 , 0.2)       |
| Other                | 0.08 (0 , 0.16)       | 0 (-0.12 , 0.12)      | 0.13 (0.02 , 0.23)    | 0.12 (-0.1 , 0.35)    | -0.03 (-0.27 , 0.21)       | 0.01 (-0.16 , 0.18)      |
| None                 | 0.23 (0.18 , 0.28)    | 0.12 (0.05 , 0.2)     | 0.28 (0.22 , 0.35)    | 0.19 (0.05 , 0.34)    | 0.16 (0.01 , 0.3)          | 0.17 (0.06 , 0.27)       |
| Prefer not to answer | 0.2 (0.06 , 0.34)     | 0.2 (-0.03 , 0.42)    | 0.2 (0.02 , 0.38)     | 0.24 (-0.1 , 0.57)    | 0.39 (0.08 , 0.71)         | 0.18 (-0.11 , 0.48)      |
| Comorbidities        |                       |                       |                       |                       |                            |                          |
| Hyperlipidaemia      | -0.03 (-0.13 , 0.07)  | 0.03 (-0.16 , 0.21)   | -0.05 (-0.16 , 0.06)  | -0.11 (-0.25 , 0.04)  | -0.1 (-0.27 , 0.08)        | -0.16 (-0.38 , 0.06)     |
| Renal failure        | 1.2 (1.11 , 1.24)     | 1.3 (1.15 , 1.38)     | 1.1 (1.06 , 1.21)     | 0.96 (0.83 , 1.08)    | 0.98 (0.84 , 1.11)         | 1.1 (1.01 , 1.27)        |
| Liver failure        | 1.4 (1.22 , 1.69)     | 1.4 (0.98 , 1.76)     | 1.5 (1.19 , 1.77)     | 0.73 (-0.08 , 1.53)   | 1.4 (1 , 1.91)             | 0.67 (-0.21 , 1.55)      |
| Heart failure        | 1.5 (1.41 , 1.52)     | 1.7 (1.61 , 1.82)     | 1.4 (1.31 , 1.44)     | 1.1 (1 , 1.21)        | 1.4 (1.22 , 1.48)          | 1.2 (1.06 , 1.32)        |
